# Supplementary material for: The mental well-being and coping strategies of Canadian adolescents during the COVID-19 pandemic: a qualitative, cross-sectional study
Source: PubMed Central journal article supplement — CMAJ Open. 2021 Nov 16;9(4):E1013–20. doi: 10.9778/cmajo.20210042 (PMC8598240; doi:10.9778/cmajo.20210042), 2021-11-16

## Appendix 1

### List of organizations that we reached out to for recruitment:

- YMCA of South Western Ontario
- Boys and Girls Club of London
- London District Catholic School Board
- Thames Valley District School Board
- Conseil scolaire Viamonde
- Conseil scolaire catholique Providence
- HEAL Youth Advisory Council
- City of London
- Child & Youth Network
- Middlesex County
- Greens Community Canada
- South West Public Health
- Middlesex London Health Unit
- BC Healthy Communities
- Centre for Active Living

### Examples of Twitter posts for recruitment

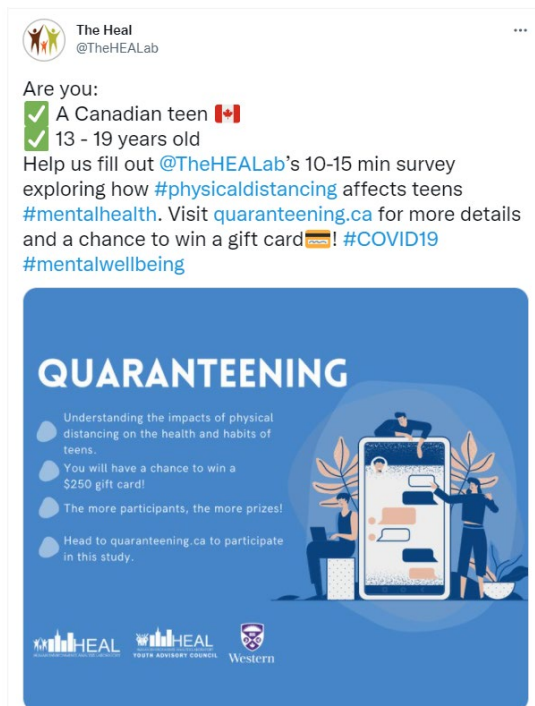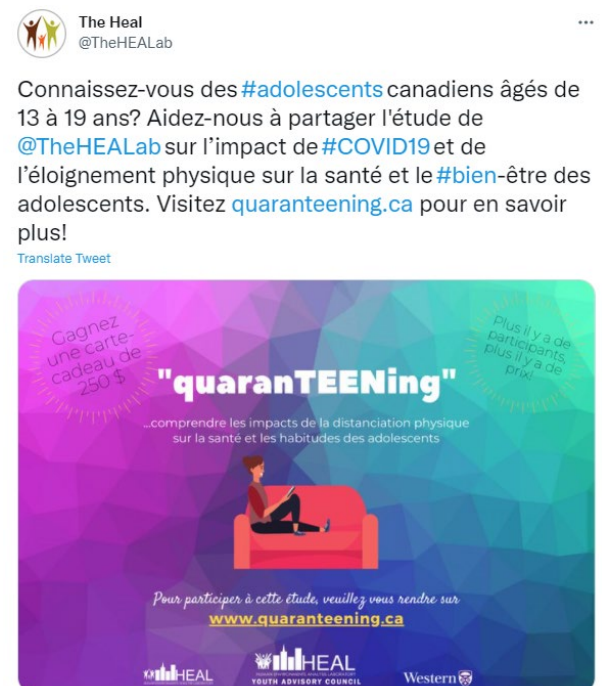

**Examples of Instagram posts for recruitment**

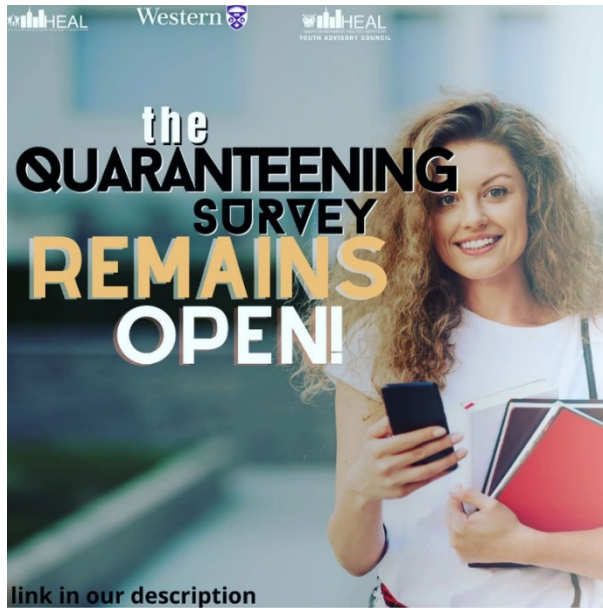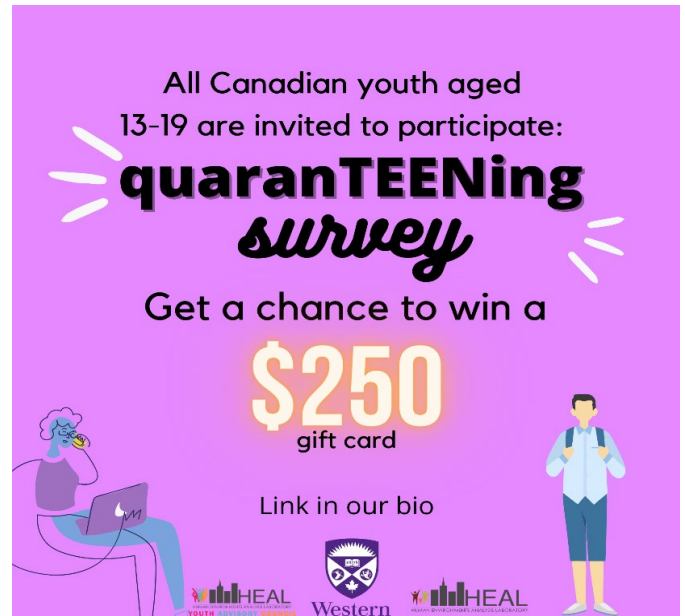

Supplement: 2021-0042-1-at.pdf [file 2021-0042-1-at.pdf]
