# Supplementary material for: The mental well-being and coping strategies of Canadian adolescents during the COVID-19 pandemic: a qualitative, cross-sectional study
Source: PubMed Central journal article supplement — CMAJ Open. 2021 Nov 16;9(4):E1013–20. doi: 10.9778/cmajo.20210042 (PMC8598240; doi:10.9778/cmajo.20210042), 2021-11-16
Supplement: open-2021-0042-standards-for-reporting-qualitative-research.pdf [file open-2021-0042-standards-for-reporting-qualitative-research.pdf]

### Standards for Reporting Qualitative Research: A Synthesis of Recommendations

O'Brien, Bridget C.; Harris, Ilene B.; Beckman, Thomas J.; Reed, Darcy A.; Cook, David A. *Academic Medicine*89(9):1245-1251, September 2014.

| <b>Title and Abstract</b>                                                                    | <b>Page Number</b>                                                                                                                                                          |
|----------------------------------------------------------------------------------------------|-----------------------------------------------------------------------------------------------------------------------------------------------------------------------------|
| Title                                                                                        | 1                                                                                                                                                                           |
| Abstract                                                                                     | 1                                                                                                                                                                           |
| <b>Introduction</b>                                                                          |                                                                                                                                                                             |
| Problem formulation                                                                          | 2                                                                                                                                                                           |
| Purpose of research question                                                                 | 2                                                                                                                                                                           |
| <b>Methods</b>                                                                               |                                                                                                                                                                             |
| Qualitative approach and research paradigm                                                   | 2-3                                                                                                                                                                         |
| Researcher characteristics and reflexivity                                                   | N/A; Given this was an anonymous survey, we did not interact with participants in the context of knowledge production and thus have not included discussion on reflexivity. |
| Context                                                                                      | 2-3                                                                                                                                                                         |
| Sampling Strategy                                                                            | 2-3, Appendix A; 12-18 (CHERRIES checklist)                                                                                                                                 |
| Ethical issues pertaining to human subjects                                                  | N/A                                                                                                                                                                         |
| Data collection methods                                                                      | 2-3                                                                                                                                                                         |
| Data collection instruments and techniques                                                   | 2-3                                                                                                                                                                         |
| Units of study                                                                               | 3                                                                                                                                                                           |
| Data processing                                                                              | 3                                                                                                                                                                           |
| Data analysis                                                                                | 3                                                                                                                                                                           |
| Techniques to enhance trustworthiness                                                        | 3                                                                                                                                                                           |
| <b>Results/findings</b>                                                                      |                                                                                                                                                                             |
| Synthesis and interpretation                                                                 | 3-7                                                                                                                                                                         |
| Links to empirical data                                                                      | Within discussion, 8-9                                                                                                                                                      |
| <b>Discussion</b>                                                                            |                                                                                                                                                                             |
| Integration with prior work, implications, transferability, and contribution(s) to the field | 8-9                                                                                                                                                                         |
| Limitations                                                                                  | 9                                                                                                                                                                           |
| <b>Other</b>                                                                                 |                                                                                                                                                                             |
| Conflicts of interest                                                                        | N/A                                                                                                                                                                         |
| Funding                                                                                      | 10                                                                                                                                                                          |
